# Supplementary material for: P42 Ebp1 regulates the proteasomal degradation of the p85 regulatory subunit of PI3K by recruiting a chaperone-E3 ligase complex HSP70/CHIP
Source: PubMed Central journal article supplement — Cell Death Dis. 2014 Mar 20;5(3):e1131–. doi: 10.1038/cddis.2014.79 (PMC3973206; doi:10.1038/cddis.2014.79), 2014-03-20

**Supplementary Figure 1**

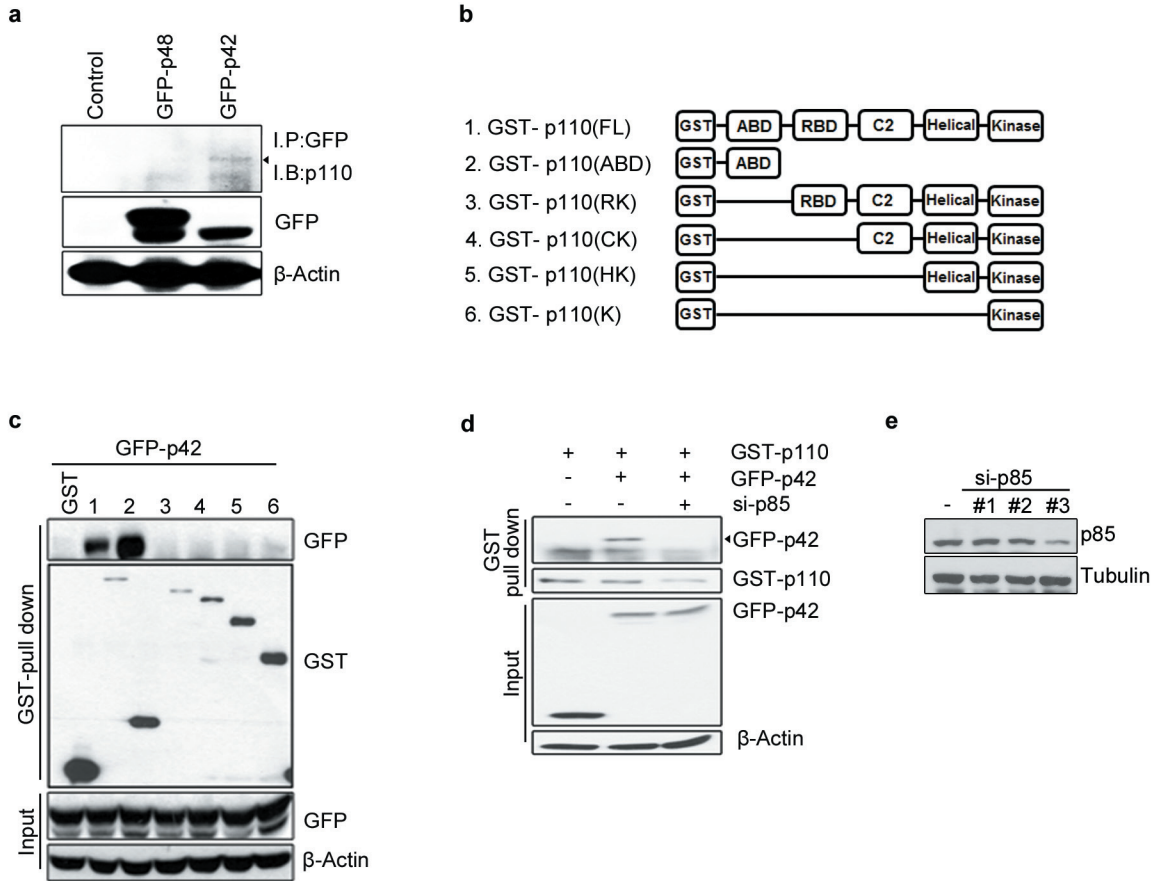

Supplementary Figure 2

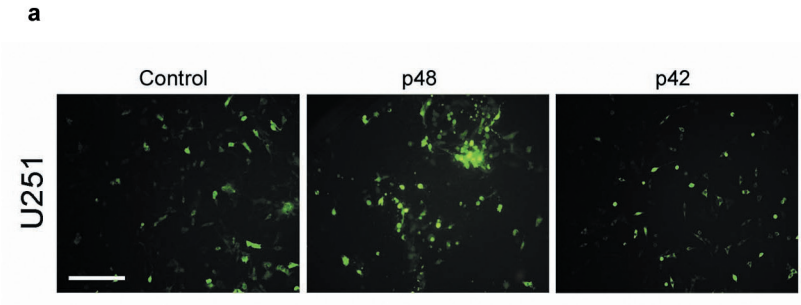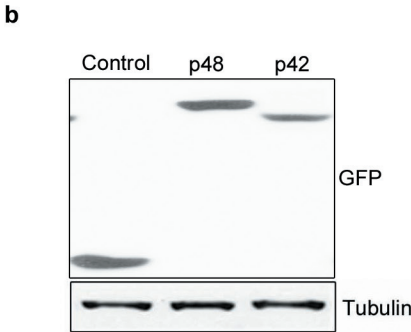

**Supplementary Figure 3**

**a**

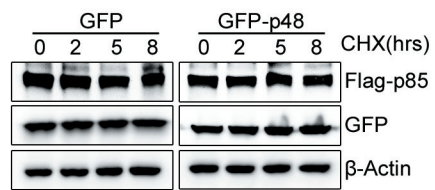

**b**

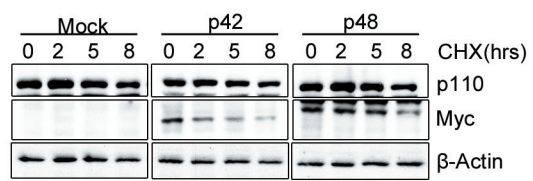

**Supplementary Figure 4**

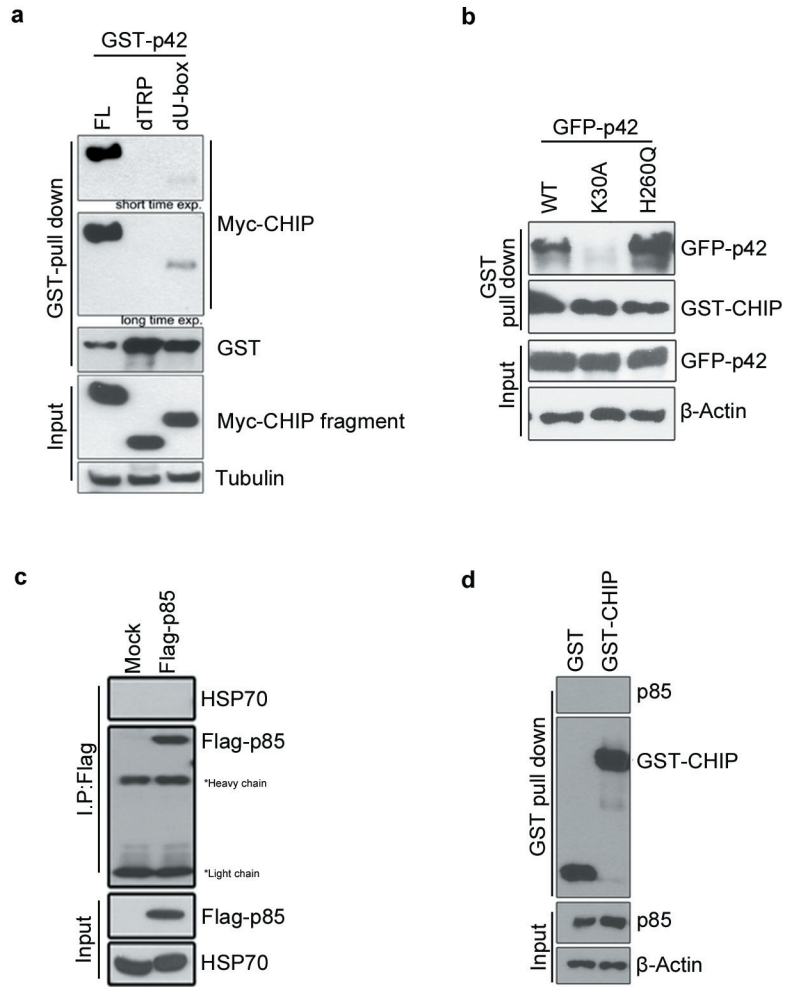

Supplementary Figure 5

**a**

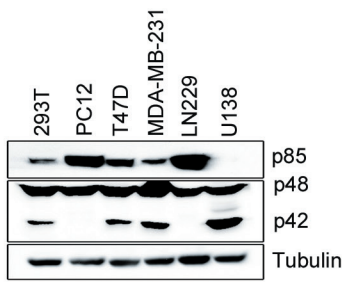

**b**

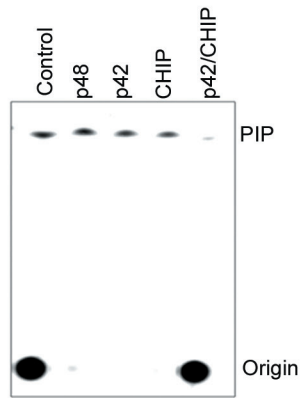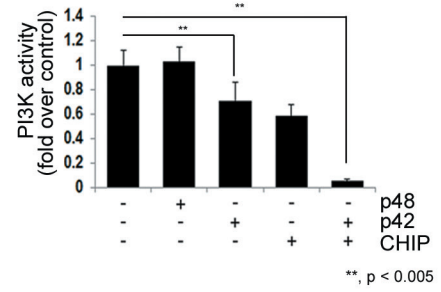

**Supplementary Figure 6**

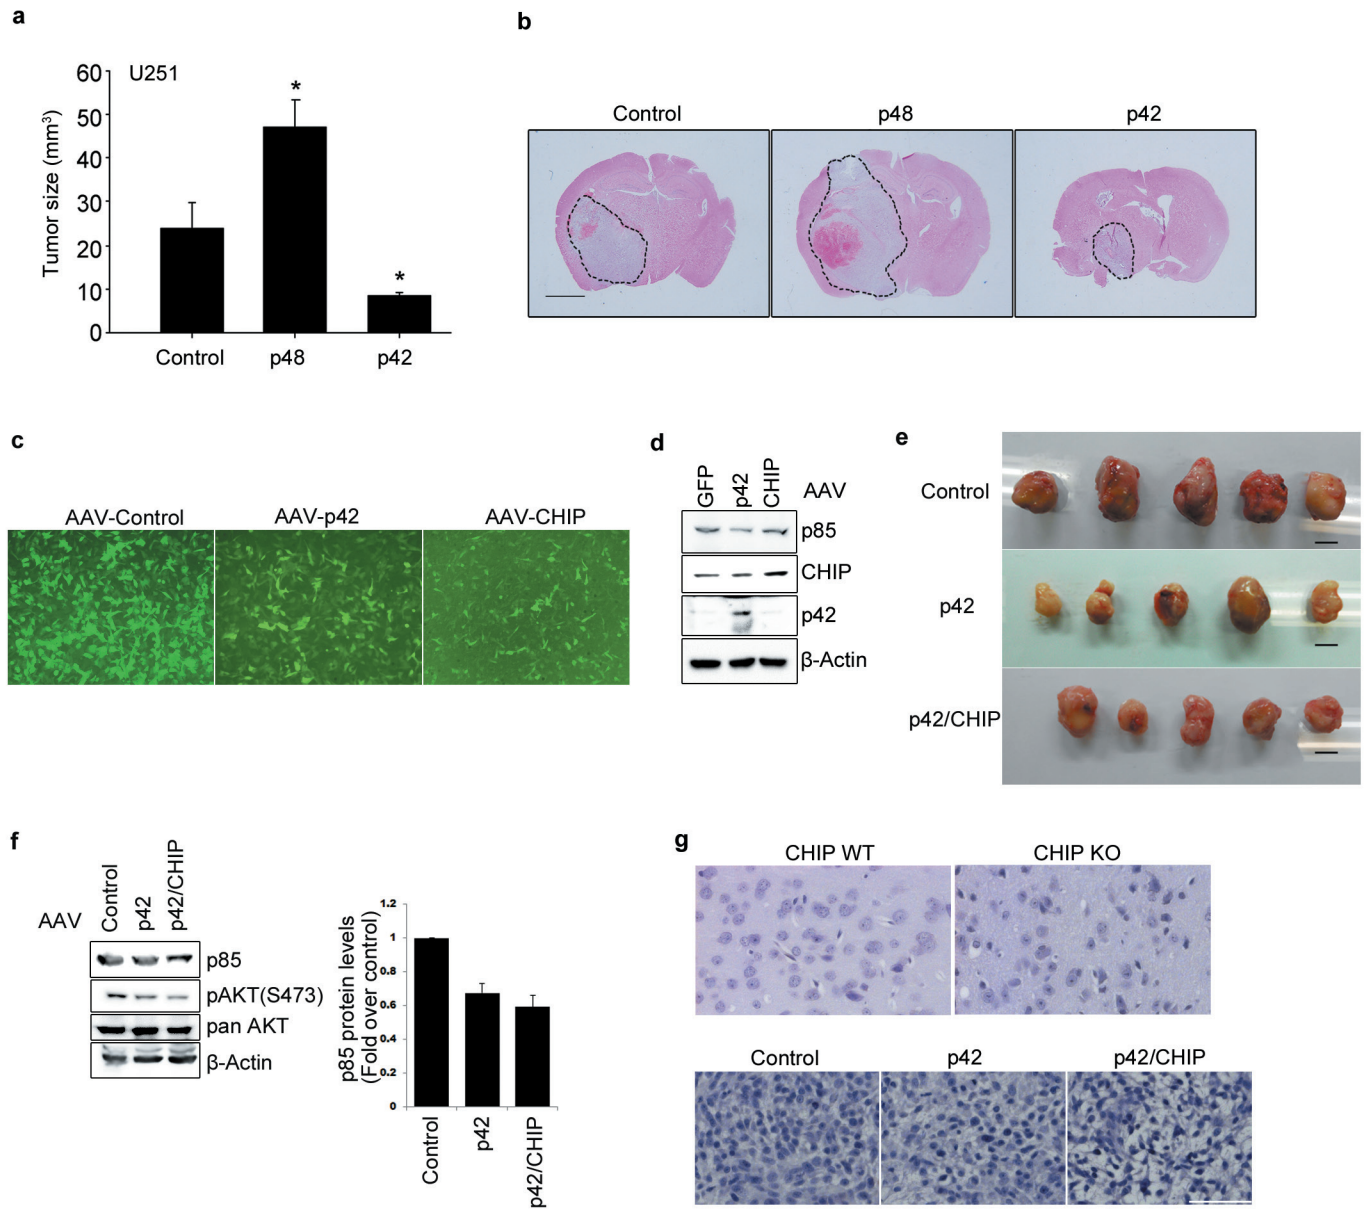

Supplementary Figure 7

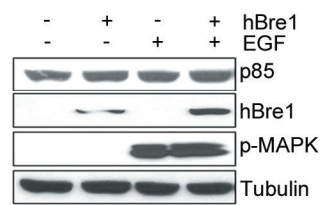

Supplement: cddis201479x1.pdf [file cddis201479x1.pdf]
